# Supplementary material for: A surface-independent bioglue using photo-crosslinkable benzophenone moiety
Source: Royal Society of Chemistry journal article supplement (doi:10.1039/d4ra01866d), 2024-01-01
Supplement: d4ra01866d1.pdf [file d4ra01866d1.pdf]

## Supplementary information

### **A surface-independent bio-glue using photo-crosslinkable benzophenone moiety**

Yue Shi<sup>1</sup>, Xuelian Tao<sup>2</sup>, Ping Du<sup>2</sup>, Paul Pasic<sup>3</sup>, Lars Esser<sup>3</sup>, Hsien-Yeh Chen<sup>4</sup>, Helmut Thissen<sup>3</sup>, Peng-Yuan Wang<sup>1,\*</sup>

1. Oujiang Laboratory; Key Laboratory of Alzheimer's Disease of Zhejiang Province, Institute of Aging, Wenzhou Medical University, Wenzhou, Zhejiang 325000, China
2. Shenzhen Key Laboratory of Biomimetic Materials and Cellular Immunomodulation, Shenzhen Institute of Advanced Technology, Chinese Academy of Sciences, Shenzhen, Guangdong 518055, China
3. CSIRO Manufacturing, Research Way, Clayton, Victoria 3168, Australia
4. Department of Chemical Engineering, National Taiwan University, Taipei, Taiwan

Corresponding author: [py.wang@ojlab.ac.cn](mailto:py.wang@ojlab.ac.cn)

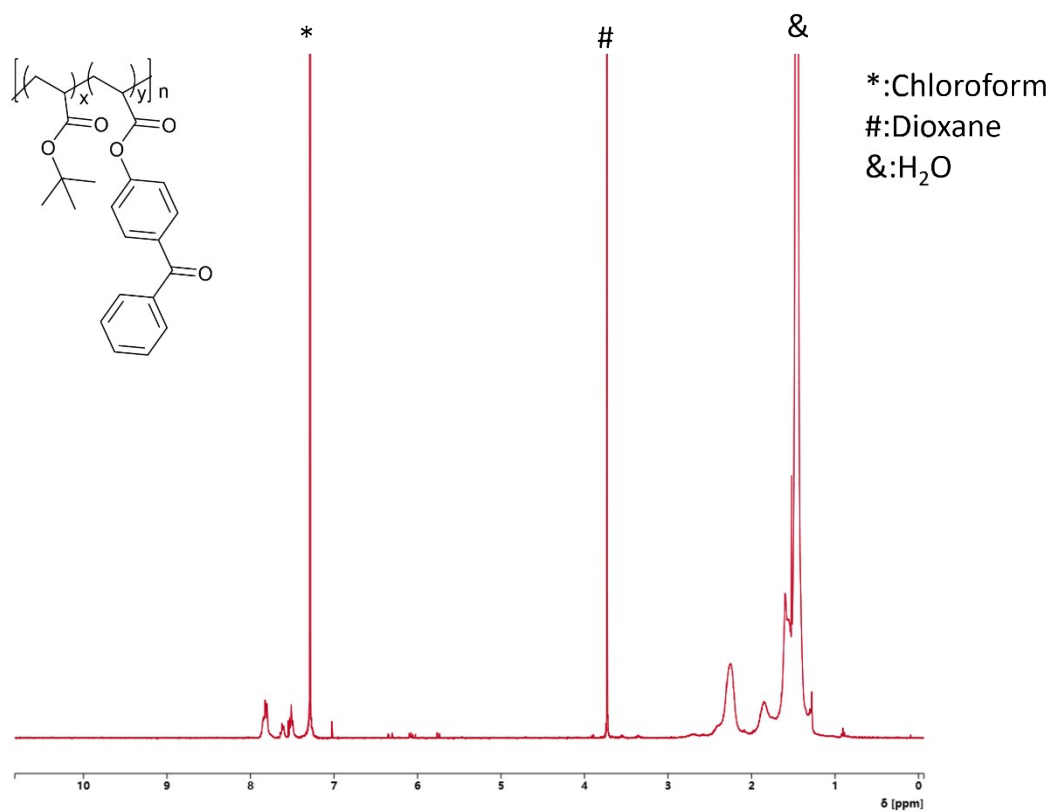

**Fig S1.** <sup>1</sup>H NMR spectrum of compound poly(BA<sub>95</sub>-BPA<sub>5</sub>) (CDCl<sub>3</sub>, 400 MHz).

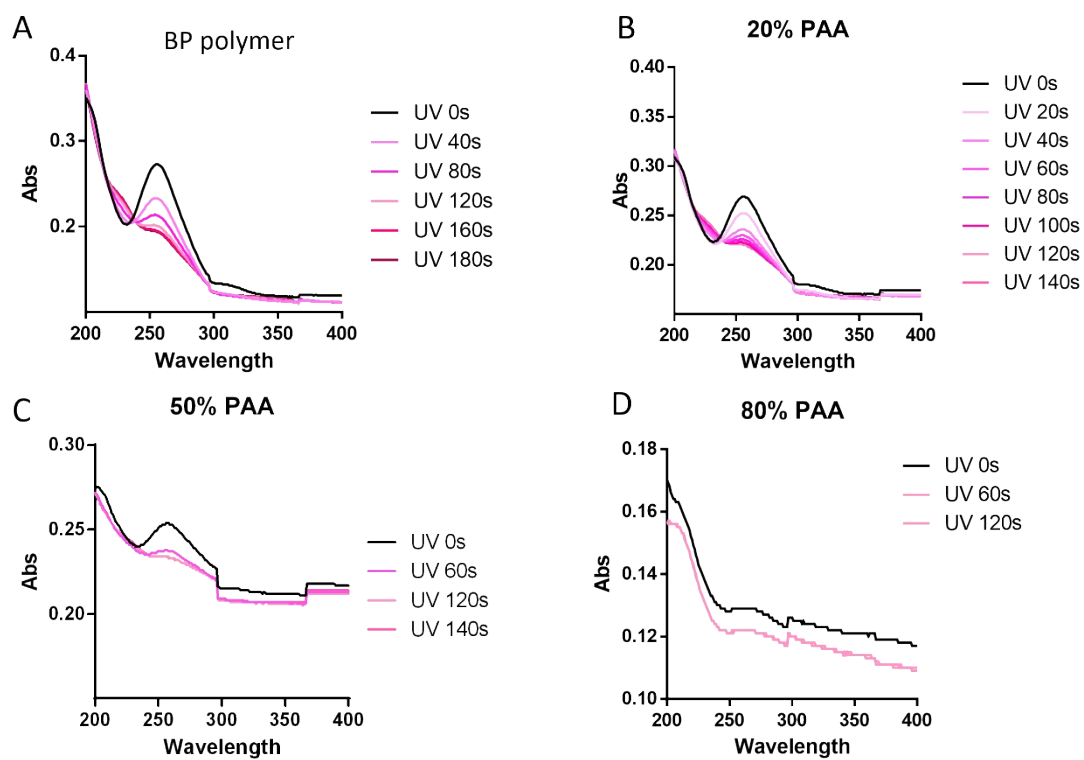

**Fig S2.** UV vis spectrum of BP-PAA coating with different UV exposure time. (A) Pure BP polymer; (B) 20% PAA + 80% BP; (C) 50% PAA + 50% PAA; (D) 80% PAA + 20% BP
